# Supplementary material for: Do active patients seek higher quality prenatal care?: A panel data analysis from Nairobi, Kenya
Source: PubMed Central journal article supplement (PMC5100690; doi:10.1016/j.ypmed.2016.09.014), 2016-11
Supplement: mmc3.pdf [file mmc3.pdf]

**Table A3. Differences between Active and Non-Active Patients in Type of ANC Facility Utilized and Quality of Care Received by ANC Visit Number Among Non-High Risk Patients**

|                                                                                                                                                                                                                                                                                             | First ANC Visit (n=402) |                    |                                 |                              | Second ANC Visit (n=398) |                    |                                 |                              | Third ANC Visit (n=364) |                    |                                 |                              |
|---------------------------------------------------------------------------------------------------------------------------------------------------------------------------------------------------------------------------------------------------------------------------------------------|-------------------------|--------------------|---------------------------------|------------------------------|--------------------------|--------------------|---------------------------------|------------------------------|-------------------------|--------------------|---------------------------------|------------------------------|
|                                                                                                                                                                                                                                                                                             | Active (n=139)          | Non-Active (n=263) | Difference: Active - Non-Active | [p-value] Ho: Difference = 0 | Active (n=139)           | Non-Active (n=259) | Difference: Active - Non-Active | [p-value] Ho: Difference = 0 | Active (n=136)          | Non-Active (n=228) | Difference: Active - Non-Active | [p-value] Ho: Difference = 0 |
| <b>Facility Characteristics:</b>                                                                                                                                                                                                                                                            |                         |                    |                                 |                              |                          |                    |                                 |                              |                         |                    |                                 |                              |
| Visit was at a Private ANC Facility                                                                                                                                                                                                                                                         | 12.60%                  | 7.40%              | 12.60%                          | [0.112]                      | 18.90%                   | 7.50%              | 11.50%                          | <0.001***                    | 25.00%                  | 6.50%              | 18.50%                          | [0.001]***                   |
| Visit was at a Facility in Own Neighborhood                                                                                                                                                                                                                                                 | 22.5%                   | 40.4%              | -17.9%                          | [0.012]**                    | 28.8%                    | 40.8%              | -12.0%                          | [0.105]                      | 33.3%                   | 40.7%              | -7.4%                           | [0.326]                      |
| Visit was at a Facility that Offers Delivery Services                                                                                                                                                                                                                                       | 49.5%                   | 62.6%              | -13.1%                          | [0.071]                      | 56.8%                    | 62.7%              | -6.0%                           | [0.419]                      | 62.3%                   | 62.8%              | -0.5%                           | [0.923]                      |
| <b>Facility Quality Measures:</b>                                                                                                                                                                                                                                                           |                         |                    |                                 |                              |                          |                    |                                 |                              |                         |                    |                                 |                              |
| Visit Included (Index out of 6): Weight, Blood Pressure, Fundal Height, Baby Heart Rate Measured, Urine Sample Taken, Iron supplements                                                                                                                                                      | 4.901                   | 5.171              | -0.270                          | [0.009]***                   | 4.411                    | 4.636              | -0.225                          | [0.142]                      | 4.636                   | 4.601              | 0.035                           | [0.683]                      |
| Respondent Rated the Overall Quality of ANC at this Visit "Excellent"                                                                                                                                                                                                                       | 12.6%                   | 17.8%              | -5.2%                           | [0.135]                      | 22.5%                    | 13.6%              | 8.9%                            | [0.054]                      | 25.0%                   | 12.6%              | 12.4%                           | [0.021]**                    |
| Respondent Ranked Facility Used for this Visit as Highest Quality                                                                                                                                                                                                                           | 7.1%                    | 18.9%              | -11.8%                          | [0.033]**                    | 10.6%                    | 17.8%              | -7.2%                           | [0.155]                      | 19.3%                   | 19.9%              | -0.6%                           | [0.923]                      |
| Patient Delivered at ANC Facility Used for this Visit                                                                                                                                                                                                                                       | 7.2%                    | 26.3%              | -19.1%                          | [0.001]***                   | 9.9%                     | 26.1%              | -16.2%                          | [0.007]***                   | 18.5%                   | 25.6%              | -7.1%                           | [0.267]                      |
| Patient Delivered at ANC Facility Used for this Visit (Among those Attending ANC at a Facility that Offers Delivery)                                                                                                                                                                        | 14.3%                   | 41.7%              | -27.4%                          | <0.001***                    | 17.5%                    | 41.3%              | -23.8%                          | [0.001]***                   | 29.4%                   | 40.8%              | -11.4%                          | [0.198]                      |
| *** p<0.01, ** p<0.05                                                                                                                                                                                                                                                                       |                         |                    |                                 |                              |                          |                    |                                 |                              |                         |                    |                                 |                              |
| Sample is restricted to women who reported that no health professionals informed them that their pregnancy was high risk.                                                                                                                                                                   |                         |                    |                                 |                              |                          |                    |                                 |                              |                         |                    |                                 |                              |
| "Active" is defined as those who attended more than one ANC facility                                                                                                                                                                                                                        |                         |                    |                                 |                              |                          |                    |                                 |                              |                         |                    |                                 |                              |
| P-values are from ordinary least squares regressions with the dependent variable indicated in Column 1 regressed on a constant term and a binary variable for "Active" and test whether the coefficient on "Active" is significantly different from zero, separately for each visit number. |                         |                    |                                 |                              |                          |                    |                                 |                              |                         |                    |                                 |                              |
| Robust standard errors are adjusted for clustering at the neighborhood level.                                                                                                                                                                                                               |                         |                    |                                 |                              |                          |                    |                                 |                              |                         |                    |                                 |                              |
| The variable for ANC facility utilized ranked as highest quality was only asked to respondents who received the full baseline and midline surveys (First visit: n=291; Second visit: n=287; Third visit: n=263)                                                                             |                         |                    |                                 |                              |                          |                    |                                 |                              |                         |                    |                                 |                              |
| Missing values across all 3 visits per variable: quality index (8); excellent services (1); ANC facility offers delivery services (4); delivery facility at facility utilized for ANC (4); delivered at ANC facility that offers delivery (4)                                               |                         |                    |                                 |                              |                          |                    |                                 |                              |                         |                    |                                 |                              |
