# Supplementary material for: Do active patients seek higher quality prenatal care?: A panel data analysis from Nairobi, Kenya
Source: PubMed Central journal article supplement (PMC5100690; doi:10.1016/j.ypmed.2016.09.014), 2016-11
Supplement: mmc4.pdf [file mmc4.pdf]

**Table A4. Differences in Odds Ratios and Incidence Rate Ratios between Active and Non-Active Patients in Type of ANC Facility Utilized and Quality of Care Received by ANC Visit Number**

|                                                                                                                                                                                                                                                                                                                                                                    | First ANC Visit (n=402)               |                                       | Second ANC Visit (n=398)              |                                    | Third ANC Visit (n=364)               |                                    |
|--------------------------------------------------------------------------------------------------------------------------------------------------------------------------------------------------------------------------------------------------------------------------------------------------------------------------------------------------------------------|---------------------------------------|---------------------------------------|---------------------------------------|------------------------------------|---------------------------------------|------------------------------------|
|                                                                                                                                                                                                                                                                                                                                                                    | Difference:<br>Active -<br>Non-Active | [p-value]<br>Ho:<br>Difference =<br>0 | Difference:<br>Active -<br>Non-Active | [p-value]<br>Ho: Difference<br>= 0 | Difference:<br>Active -<br>Non-Active | [p-value]<br>Ho: Difference<br>= 0 |
| <b>Facility Characteristics:</b>                                                                                                                                                                                                                                                                                                                                   |                                       |                                       |                                       |                                    |                                       |                                    |
| Visit was at a Private ANC Facility                                                                                                                                                                                                                                                                                                                                | 1.693                                 | [0.097]*                              | 3.150                                 | [0.000]***                         | 4.592                                 | [0.000]***                         |
| Visit was at a Facility in Own Neighborhood                                                                                                                                                                                                                                                                                                                        | 0.436                                 | [0.000]***                            | 0.625                                 | [0.081]*                           | 0.626                                 | [0.097]*                           |
| Visit was at a Facility that Offers Delivery Services                                                                                                                                                                                                                                                                                                              | 0.658                                 | [0.144]                               | 0.861                                 | [0.618]                            | 1.100                                 | [0.680]                            |
| <b>Facility Quality Measures:</b>                                                                                                                                                                                                                                                                                                                                  |                                       |                                       |                                       |                                    |                                       |                                    |
| Visit Included (Index out of 6):<br><i>Weight, Blood Pressure, Fundal Height, Baby Heart Rate Measured, Urine Sample Taken, Iron supplements</i>                                                                                                                                                                                                                   | 0.934                                 | [0.001]***                            | 0.971                                 | [0.251]                            | 1.000                                 | [0.994]                            |
| Respondent Rated the Overall Quality of ANC at this Visit "Excellent"                                                                                                                                                                                                                                                                                              | 0.772                                 | [0.292]                               | 1.972                                 | [0.002]***                         | 2.191                                 | [0.004]***                         |
| Respondent Ranked Facility Used for this Visit as Highest Quality                                                                                                                                                                                                                                                                                                  | 0.294                                 | [0.013]**                             | 0.658                                 | [0.302]                            | 1.290                                 | [0.452]                            |
| Patient Delivered at ANC Facility Used for this Visit                                                                                                                                                                                                                                                                                                              | 0.239                                 | [0.000]***                            | 0.380                                 | [0.005]***                         | 0.726                                 | [0.348]                            |
| Patient Delivered at ANC Facility Used for this Visit (Among those Attending ANC at a Facility that Offers Delivery)                                                                                                                                                                                                                                               | 0.247                                 | [0.000]***                            | 0.361                                 | [0.002]***                         | 0.718                                 | [0.360]                            |
| *** p<0.01, ** p<0.05                                                                                                                                                                                                                                                                                                                                              |                                       |                                       |                                       |                                    |                                       |                                    |
| "Active" is defined as those who attended more than one ANC facility                                                                                                                                                                                                                                                                                               |                                       |                                       |                                       |                                    |                                       |                                    |
| P-values are from logistic regressions with the dependent variable indicated in Column 1 regressed on a binary variable for "Active" and test whether the coefficient on "Active" is significantly different from zero, separately for each visit number; The continuous variable of the quality index uses a poisson regression, reporting incidence rate ratios. |                                       |                                       |                                       |                                    |                                       |                                    |
| Robust standard errors are adjusted for clustering at the neighborhood level.                                                                                                                                                                                                                                                                                      |                                       |                                       |                                       |                                    |                                       |                                    |
| Missing values across all 3 visits per variable: quality index (9); excellent services (1); ANC facility offers delivery services (4); delivery facility at facility utilized for ANC (4); delivered at ANC facility that offers delivery (4)                                                                                                                      |                                       |                                       |                                       |                                    |                                       |                                    |
